# Supplementary material for: Structure and rheology of nanoparticle–polymer suspensions
Source: Royal Society of Chemistry journal article supplement (doi:10.1039/c2sm06889c), 2012-01-01
Supplement: c2sm06889c.pdf [file c2sm06889c.pdf]

## Structure and Rheology of Nanoparticle/Polymer Suspensions

Samanvaya Srivastava, Jung Hwan Shin and Lynden A. Archer

### Supplementary Information

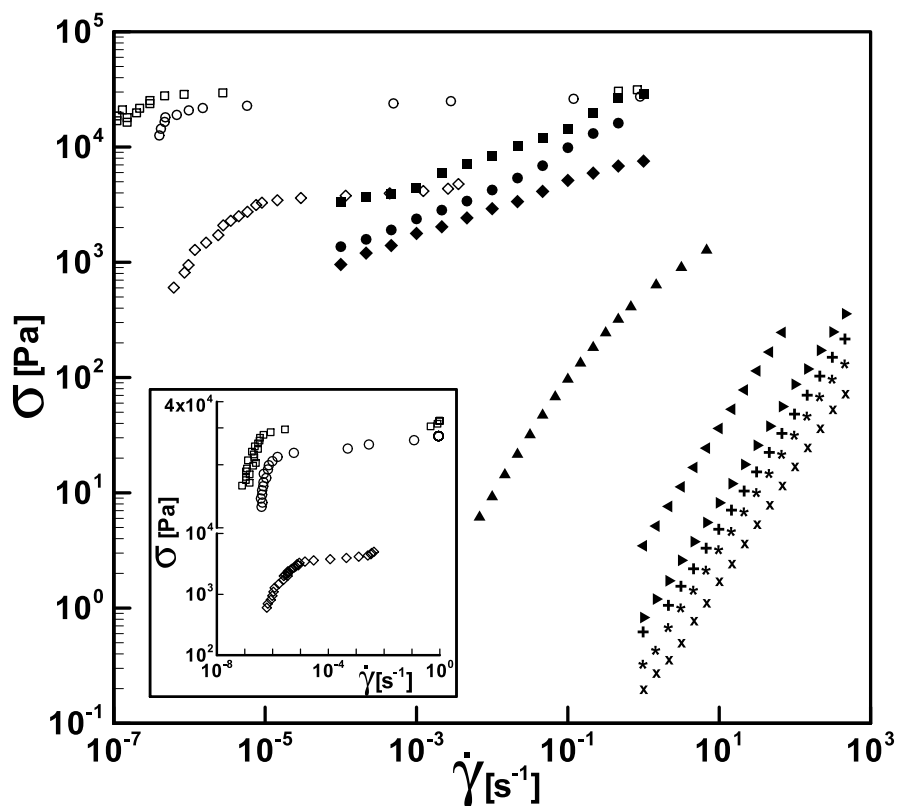

**Fig.S1** Shear stress vs. rate for PEG-SiO<sub>2</sub>/PEG suspensions with  $D = 10$  nm cores and  $\phi_c$  as indicated in the Figure 4. Filled and open symbols correspond to measurements from constant shear rate and constant stress measurements, respectively. Inset: shear stress vs. rate from the stress sweep measurements for the jammed PEG-SiO<sub>2</sub>/PEG suspensions with adjusted scaling.

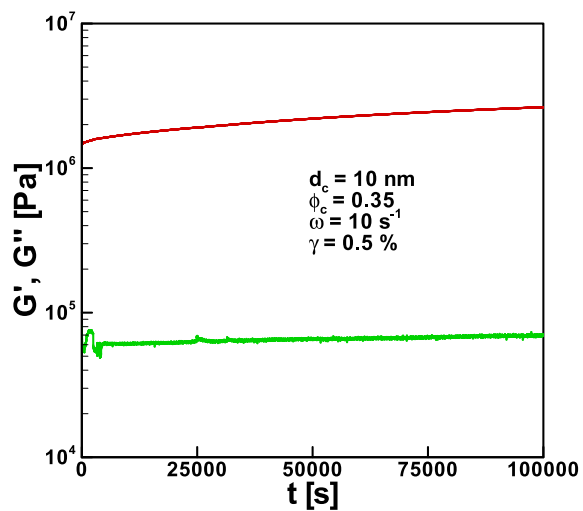

**Fig.S2** Dynamic shear modulus of PEG-SiO<sub>2</sub>/PEG suspensions with D = 10 nm cores and  $\phi_c = 0.35$  as a function of time. The results show that these suspensions age with time, but the ageing effects are negligible in comparison to those reported for other jammed examples of jammed matter.
